# Supplementary material for: Evaluation of Coupling Coordination among the Urban Physical Environment, Economy, and Population: A Case Study of 36 Main Cities in China
Source: Hindawi journal article supplement (doi:10.1155/2019/1576292), 2019-01-01
Supplement: f1 [file 1576292.f1.zip]

Archive with 6 entries (6 files):
- 1576292.f1/Table 1 Weights of the UPE system.docx
- 1576292.f1/Table 2 Weights of economic and population system .docx
- 1576292.f1/Table 3 Comprehensive scores of UPE system.docx
- 1576292.f1/Table 4 Comprehensive scores of economic system .docx
- 1576292.f1/Table 5 Comprehensive score of population system.docx
- 1576292.f1/Table 6 The scores of CCD among UPE- economy- and population.docx
