# Supplementary material for: Evaluation of Coupling Coordination among the Urban Physical Environment, Economy, and Population: A Case Study of 36 Main Cities in China
Source: Hindawi journal article supplement (doi:10.1155/2019/1576292), 2019-01-01
Supplement: f1 [file 1576292.f1.zip › 1576292.f1/Table 1 Weights of the UPE system.docx]

Table 1 Weights of the UPE system

| Primary indicators | | Weight(%) | Secondary indicators | Weight(%) | |
| --- | --- | --- | --- | --- | --- |
| Climate | 27.0 | | Temperature | | 8.6 |
| Humidity | | 7.9 |
| Precipitation | | 2.8 |
| Sunshine condition | | 7.7 |
| Quality of ambient air and atmosphere | 14.6 | | Air quality | | 7.4 |
| Airborne hazardous substances | | 7.2 |
| Freshwater | 16.6 | | Water resource | | 16.6 |
| Wastewater | 7.3 | | Sewage treatment rate | | 7.3 |
| Built environment | 25.8 | | Road | | 7.5 |
| Public transport | | 4.4 |
| Urban green level | | 6.2 |
| Urban construction | | 7.7 |
| Noise | 8.8 | | Noise | | 8.8 |
