# Supplementary material for: Evaluation of Coupling Coordination among the Urban Physical Environment, Economy, and Population: A Case Study of 36 Main Cities in China
Source: Hindawi journal article supplement (doi:10.1155/2019/1576292), 2019-01-01
Supplement: f1 [file 1576292.f1.zip › 1576292.f1/Table 2 Weights of economic and population system .docx]

Table 2 Weights of economic and population system

| Sub-system | First-level | Weight(%) | Second-level | Weight(%) |
| --- | --- | --- | --- | --- |
| Economy | Economic aggregates | 40.7 | GDP | 10.6 |
| Fixed asset investment | 9.5 |
| Total retail sales of consumer goods | 10.6 |
| Per capita GDP | 10.0 |
| Economic structure | 28.7 | Percentage of secondary industry in GDP | 6.7 |
| Percentage of tertiary industry in GDP | 9.6 |
| Actual utilization of foreign capital | 12.4 |
| Economic growth | 7.9 | GDP growth rate | 7.9 |
| Economic benefit | 22.6 | Productivity of total industry employed persons | 11.8 |
| Per capital Value-added of tertiary industry | 10.8 |
| Population |  |  | Total population | 38.7 |
|  | Number of employees | 61.3 |
