# Supplementary material for: Evaluation of Coupling Coordination among the Urban Physical Environment, Economy, and Population: A Case Study of 36 Main Cities in China
Source: Hindawi journal article supplement (doi:10.1155/2019/1576292), 2019-01-01
Supplement: f1 [file 1576292.f1.zip › 1576292.f1/Table 3 Comprehensive scores of UPE system.docx]

Table 3 Comprehensive scores of UPE system

|  | 2003 | 2004 | 2005 | 2006 | 2007 | 2008 | 2009 | 2010 | | 2011 | | 2012 | | 2013 | | 2014 | | 2015 | | 2016 | |
| --- | --- | --- | --- | --- | --- | --- | --- | --- | --- | --- | --- | --- | --- | --- | --- | --- | --- | --- | --- | --- | --- |
| **Beijing** | 0.412 | 0.415 | 0.436 | 0.408 | 0.418 | 0.442 | 0.447 | 0.434 | | 0.461 | | 0.460 | | 0.460 | | 0.477 | | 0.501 | | 0.486 | |
| **Tianjin** | 0.310 | 0.336 | 0.350 | 0.353 | 0.373 | 0.390 | 0.385 | 0.365 | 0.414 | | 0.411 | | 0.396 | | 0.424 | | 0.427 | | 0.434 | |
| **Shijiazhuang** | 0.287 | 0.334 | 0.323 | 0.329 | 0.423 | 0.446 | 0.451 | 0.461 | 0.410 | | 0.435 | | 0.389 | | 0.398 | | 0.463 | | 0.386 | |
| **Taiyuan** | 0.305 | 0.317 | 0.330 | 0.344 | 0.352 | 0.371 | 0.377 | 0.388 | 0.404 | | 0.411 | | 0.390 | | 0.413 | | 0.429 | | 0.422 | |
| **Hohhot** | 0.397 | 0.409 | 0.409 | 0.396 | 0.398 | 0.412 | 0.417 | 0.419 | 0.422 | | 0.447 | | 0.480 | | 0.454 | | 0.475 | | 0.463 | |
| **Shenyang** | 0.343 | 0.344 | 0.379 | 0.365 | 0.367 | 0.405 | 0.401 | 0.425 | 0.416 | | 0.436 | | 0.408 | | 0.375 | | 0.388 | | 0.410 | |
| **Dalian** | 0.394 | 0.389 | 0.405 | 0.395 | 0.439 | 0.447 | 0.424 | 0.602 | 0.443 | | 0.477 | | 0.461 | | 0.441 | | 0.446 | | 0.449 | |
| **Changchun** | 0.347 | 0.354 | 0.398 | 0.367 | 0.383 | 0.381 | 0.383 | 0.459 | 0.454 | | 0.469 | | 0.436 | | 0.416 | | 0.426 | | 0.475 | |
| **Haerbin** | 0.361 | 0.344 | 0.359 | 0.366 | 0.357 | 0.348 | 0.425 | 0.401 | 0.374 | | 0.394 | | 0.443 | | 0.382 | | 0.384 | | 0.412 | |
| **Shanghai** | 0.365 | 0.391 | 0.377 | 0.414 | 0.383 | 0.382 | 0.413 | 0.404 | 0.424 | | 0.435 | | 0.418 | | 0.434 | | 0.412 | | 0.416 | |
| **Nanjing** | 0.393 | 0.394 | 0.421 | 0.438 | 0.443 | 0.452 | 0.433 | 0.436 | 0.454 | | 0.447 | | 0.460 | | 0.475 | | 0.497 | | 0.497 | |
| **Suzhou** | 0.384 | 0.383 | 0.422 | 0.421 | 0.456 | 0.452 | 0.466 | 0.472 | 0.451 | | 0.476 | | 0.465 | | 0.481 | | 0.503 | | 0.502 | |
| **Hangzhou** | 0.363 | 0.385 | 0.437 | 0.419 | 0.379 | 0.377 | 0.429 | 0.465 | 0.414 | | 0.492 | | 0.440 | | 0.471 | | 0.495 | | 0.471 | |
| **Ningbo** | 0.428 | 0.438 | 0.473 | 0.453 | 0.481 | 0.481 | 0.501 | 0.532 | 0.467 | | 0.534 | | 0.428 | | 0.459 | | 0.500 | | 0.481 | |
| **Hefei** | 0.466 | 0.432 | 0.426 | 0.438 | 0.450 | 0.372 | 0.433 | 0.450 | 0.417 | | 0.450 | | 0.434 | | 0.446 | | 0.490 | | 0.508 | |
| **Fuzhou** | 0.494 | 0.475 | 0.485 | 0.507 | 0.514 | 0.514 | 0.485 | 0.527 | 0.491 | | 0.520 | | 0.524 | | 0.518 | | 0.544 | | 0.530 | |
| **Xiamen** | 0.535 | 0.531 | 0.580 | 0.567 | 0.561 | 0.553 | 0.512 | 0.557 | 0.524 | | 0.569 | | 0.575 | | 0.555 | | 0.586 | | 0.575 | |
| **Nanchang** | 0.497 | 0.451 | 0.497 | 0.515 | 0.521 | 0.521 | 0.469 | 0.506 | 0.525 | | 0.546 | | 0.537 | | 0.558 | | 0.580 | | 0.555 | |
| **Jinan** | 0.444 | 0.360 | 0.369 | 0.358 | 0.388 | 0.381 | 0.373 | 0.385 | 0.417 | | 0.448 | | 0.424 | | 0.403 | | 0.430 | | 0.438 | |
| **Qingdao** | 0.461 | 0.361 | 0.380 | 0.382 | 0.440 | 0.451 | 0.455 | 0.451 | 0.585 | | 0.465 | | 0.409 | | 0.404 | | 0.427 | | 0.403 | |
| **Zhengzhou** | 0.293 | 0.299 | 0.317 | 0.318 | 0.357 | 0.324 | 0.346 | 0.308 | 0.336 | | 0.345 | | 0.315 | | 0.353 | | 0.339 | | 0.344 | |
| **Wuhan** | 0.392 | 0.369 | 0.392 | 0.367 | 0.454 | 0.443 | 0.431 | 0.450 | 0.405 | | 0.430 | | 0.428 | | 0.439 | | 0.453 | | 0.490 | |
| **Changsha** | 0.437 | 0.433 | 0.454 | 0.480 | 0.469 | 0.478 | 0.482 | 0.534 | 0.459 | | 0.513 | | 0.500 | | 0.517 | | 0.530 | | 0.536 | |
| **Guangzhou** | 0.496 | 0.474 | 0.493 | 0.530 | 0.523 | 0.540 | 0.532 | 0.543 | 0.533 | | 0.553 | | 0.576 | | 0.543 | | 0.578 | | 0.570 | |
| **Shenzhen** | 0.587 | 0.539 | 0.550 | 0.605 | 0.584 | 0.581 | 0.577 | 0.575 | 0.574 | | 0.582 | | 0.620 | | 0.590 | | 0.608 | | 0.588 | |
| **Nanning** | 0.494 | 0.507 | 0.483 | 0.531 | 0.524 | 0.537 | 0.563 | 0.553 | 0.558 | | 0.586 | | 0.583 | | 0.574 | | 0.596 | | 0.586 | |
| **Haikou** | 0.541 | 0.557 | 0.582 | 0.591 | 0.593 | 0.590 | 0.606 | 0.592 | 0.600 | | 0.627 | | 0.624 | | 0.631 | | 0.617 | | 0.598 | |
| **Chongqing** | 0.374 | 0.379 | 0.401 | 0.399 | 0.470 | 0.534 | 0.456 | 0.450 | 0.492 | | 0.499 | | 0.517 | | 0.535 | | 0.533 | | 0.565 | |
| **Chengdu** | 0.472 | 0.485 | 0.471 | 0.454 | 0.494 | 0.508 | 0.507 | 0.547 | 0.521 | | 0.519 | | 0.503 | | 0.519 | | 0.553 | | 0.538 | |
| **Guiyang** | 0.431 | 0.436 | 0.444 | 0.441 | 0.481 | 0.468 | 0.459 | 0.493 | 0.434 | | 0.476 | | 0.466 | | 0.464 | | 0.485 | | 0.489 | |
| **Kunming** | 0.552 | 0.565 | 0.584 | 0.562 | 0.614 | 0.609 | 0.620 | 0.614 | 0.625 | | 0.631 | | 0.602 | | 0.651 | | 0.642 | | 0.632 | |
| **Xi'an** | 0.329 | 0.299 | 0.335 | 0.316 | 0.359 | 0.355 | 0.364 | 0.392 | 0.422 | | 0.388 | | 0.394 | | 0.412 | | 0.442 | | 0.399 | |
| **Lanzhou** | 0.272 | 0.266 | 0.296 | 0.276 | 0.303 | 0.273 | 0.268 | 0.287 | 0.301 | | 0.315 | | 0.376 | | 0.397 | | 0.389 | | 0.400 | |
| **Xining** | 0.474 | 0.476 | 0.486 | 0.478 | 0.476 | 0.481 | 0.485 | 0.484 | 0.481 | | 0.474 | | 0.465 | | 0.511 | | 0.534 | | 0.513 | |
| **Yinchuan** | 0.392 | 0.380 | 0.391 | 0.386 | 0.385 | 0.389 | 0.383 | 0.402 | 0.409 | | 0.417 | | 0.402 | | 0.418 | | 0.432 | | 0.451 | |
| **Urumqi** | 0.458 | 0.438 | 0.428 | 0.421 | 0.448 | 0.443 | 0.449 | 0.453 | 0.500 | | 0.461 | | 0.476 | | 0.501 | | 0.519 | | 0.532 | |
