# Supplementary material for: Evaluation of Coupling Coordination among the Urban Physical Environment, Economy, and Population: A Case Study of 36 Main Cities in China
Source: Hindawi journal article supplement (doi:10.1155/2019/1576292), 2019-01-01
Supplement: f1 [file 1576292.f1.zip › 1576292.f1/Table 4 Comprehensive scores of economic system .docx]

Table 4 Comprehensive scores of economic system

|  | 2003 | 2004 | 2005 | 2006 | 2007 | 2008 | 2009 | 2010 | 2011 | 2012 | 2013 | 2014 | 2015 | 2016 | |
| --- | --- | --- | --- | --- | --- | --- | --- | --- | --- | --- | --- | --- | --- | --- | --- |
| **Beijing** | 0.301 | 0.340 | 0.407 | 0.443 | 0.491 | 0.503 | 0.542 | 0.582 | 0.594 | 0.617 | 0.655 | 0.643 | 0.655 | 0.655 | |
| **Tianjin** | 0.276 | 0.304 | 0.328 | 0.357 | 0.400 | 0.461 | 0.523 | 0.607 | 0.667 | 0.694 | 0.718 | 0.705 | 0.699 | 0.660 |
| **Shijiazhuang** | 0.192 | 0.210 | 0.209 | 0.211 | 0.218 | 0.208 | 0.224 | 0.242 | 0.260 | 0.269 | 0.270 | 0.300 | 0.320 | 0.331 |
| **Taiyuan** | 0.243 | 0.249 | 0.241 | 0.222 | 0.266 | 0.219 | 0.224 | 0.242 | 0.244 | 0.256 | 0.255 | 0.262 | 0.284 | 0.288 |
| **Hohhot** | 0.315 | 0.301 | 0.363 | 0.270 | 0.278 | 0.241 | 0.279 | 0.260 | 0.262 | 0.266 | 0.306 | 0.302 | 0.314 | 0.322 |
| **Shenyang** | 0.238 | 0.256 | 0.265 | 0.290 | 0.375 | 0.354 | 0.346 | 0.371 | 0.391 | 0.416 | 0.442 | 0.403 | 0.366 | 0.333 |
| **Dalian** | 0.240 | 0.259 | 0.248 | 0.273 | 0.303 | 0.334 | 0.353 | 0.428 | 0.453 | 0.484 | 0.525 | 0.512 | 0.374 | 0.343 |
| **Changchun** | 0.206 | 0.206 | 0.173 | 0.234 | 0.269 | 0.271 | 0.259 | 0.278 | 0.275 | 0.309 | 0.337 | 0.336 | 0.342 | 0.379 |
| **Haerbin** | 0.179 | 0.196 | 0.195 | 0.196 | 0.203 | 0.210 | 0.225 | 0.252 | 0.254 | 0.271 | 0.301 | 0.299 | 0.322 | 0.344 |
| **Shanghai** | 0.433 | 0.489 | 0.527 | 0.571 | 0.642 | 0.670 | 0.686 | 0.722 | 0.718 | 0.722 | 0.731 | 0.713 | 0.708 | 0.700 |
| **Nanjing** | 0.260 | 0.293 | 0.278 | 0.290 | 0.315 | 0.307 | 0.322 | 0.361 | 0.398 | 0.439 | 0.487 | 0.488 | 0.503 | 0.518 |
| **Suzhou** | 0.356 | 0.357 | 0.361 | 0.397 | 0.438 | 0.461 | 0.487 | 0.524 | 0.558 | 0.607 | 0.629 | 0.632 | 0.620 | 0.634 |
| **Hangzhou** | 0.256 | 0.268 | 0.267 | 0.299 | 0.323 | 0.330 | 0.338 | 0.383 | 0.411 | 0.436 | 0.468 | 0.514 | 0.557 | 0.578 |
| **Ningbo** | 0.263 | 0.275 | 0.261 | 0.284 | 0.315 | 0.299 | 0.284 | 0.337 | 0.354 | 0.364 | 0.411 | 0.418 | 0.437 | 0.467 |
| **Hefei** | 0.210 | 0.233 | 0.246 | 0.256 | 0.268 | 0.266 | 0.284 | 0.301 | 0.298 | 0.301 | 0.315 | 0.325 | 0.351 | 0.373 |
| **Fuzhou** | 0.218 | 0.213 | 0.171 | 0.194 | 0.230 | 0.219 | 0.229 | 0.256 | 0.265 | 0.277 | 0.298 | 0.314 | 0.337 | 0.355 |
| **Xiamen** | 0.273 | 0.267 | 0.262 | 0.275 | 0.280 | 0.248 | 0.238 | 0.279 | 0.293 | 0.280 | 0.337 | 0.289 | 0.293 | 0.315 |
| **Nanchang** | 0.228 | 0.243 | 0.250 | 0.241 | 0.248 | 0.253 | 0.243 | 0.257 | 0.274 | 0.276 | 0.283 | 0.290 | 0.301 | 0.318 |
| **Jinan** | 0.260 | 0.286 | 0.294 | 0.294 | 0.312 | 0.298 | 0.304 | 0.341 | 0.373 | 0.409 | 0.455 | 0.470 | 0.499 | 0.523 |
| **Qingdao** | 0.223 | 0.238 | 0.243 | 0.253 | 0.264 | 0.251 | 0.255 | 0.278 | 0.278 | 0.285 | 0.310 | 0.324 | 0.340 | 0.366 |
| **Zhengzhou** | 0.236 | 0.247 | 0.253 | 0.260 | 0.271 | 0.272 | 0.276 | 0.309 | 0.349 | 0.365 | 0.389 | 0.410 | 0.445 | 0.466 |
| **Wuhan** | 0.223 | 0.246 | 0.257 | 0.267 | 0.291 | 0.316 | 0.325 | 0.368 | 0.392 | 0.425 | 0.490 | 0.503 | 0.539 | 0.560 |
| **Changsha** | 0.209 | 0.218 | 0.231 | 0.235 | 0.256 | 0.267 | 0.283 | 0.315 | 0.339 | 0.356 | 0.382 | 0.405 | 0.437 | 0.465 |
| **Guangzhou** | 0.306 | 0.313 | 0.335 | 0.365 | 0.400 | 0.429 | 0.457 | 0.520 | 0.542 | 0.568 | 0.629 | 0.607 | 0.636 | 0.647 |
| **Shenzhen** | 0.348 | 0.351 | 0.372 | 0.397 | 0.424 | 0.445 | 0.447 | 0.507 | 0.534 | 0.570 | 0.575 | 0.623 | 0.648 | 0.669 |
| **Nanning** | 0.161 | 0.184 | 0.189 | 0.222 | 0.234 | 0.202 | 0.219 | 0.212 | 0.209 | 0.209 | 0.214 | 0.207 | 0.224 | 0.235 |
| **Haikou** | 0.218 | 0.229 | 0.251 | 0.249 | 0.257 | 0.259 | 0.268 | 0.312 | 0.277 | 0.267 | 0.283 | 0.305 | 0.308 | 0.313 |
| **Chongqing** | 0.183 | 0.198 | 0.201 | 0.232 | 0.285 | 0.314 | 0.374 | 0.453 | 0.531 | 0.555 | 0.580 | 0.629 | 0.645 | 0.651 |
| **Chengdu** | 0.207 | 0.218 | 0.229 | 0.242 | 0.261 | 0.258 | 0.313 | 0.363 | 0.412 | 0.455 | 0.513 | 0.487 | 0.493 | 0.514 |
| **Guiyang** | 0.207 | 0.219 | 0.221 | 0.225 | 0.235 | 0.213 | 0.228 | 0.240 | 0.273 | 0.268 | 0.349 | 0.273 | 0.278 | 0.277 |
| **Kunming** | 0.186 | 0.201 | 0.189 | 0.202 | 0.205 | 0.207 | 0.223 | 0.244 | 0.254 | 0.277 | 0.283 | 0.264 | 0.277 | 0.287 |
| **Xi'an** | 0.218 | 0.218 | 0.222 | 0.227 | 0.247 | 0.262 | 0.271 | 0.285 | 0.293 | 0.305 | 0.335 | 0.364 | 0.369 | 0.391 |
| **Lanzhou** | 0.209 | 0.216 | 0.219 | 0.219 | 0.219 | 0.213 | 0.209 | 0.228 | 0.250 | 0.228 | 0.249 | 0.243 | 0.255 | 0.267 |
| **Xining** | 0.209 | 0.223 | 0.227 | 0.237 | 0.244 | 0.247 | 0.217 | 0.265 | 0.241 | 0.240 | 0.244 | 0.233 | 0.218 | 0.214 |
| **Yinchuan** | 0.207 | 0.217 | 0.203 | 0.208 | 0.217 | 0.211 | 0.211 | 0.232 | 0.220 | 0.230 | 0.240 | 0.224 | 0.220 | 0.224 |
| **Urumqi** | 0.254 | 0.241 | 0.257 | 0.258 | 0.261 | 0.260 | 0.224 | 0.236 | 0.271 | 0.303 | 0.279 | 0.281 | 0.314 | 0.313 |
