# Supplementary material for: Evaluation of Coupling Coordination among the Urban Physical Environment, Economy, and Population: A Case Study of 36 Main Cities in China
Source: Hindawi journal article supplement (doi:10.1155/2019/1576292), 2019-01-01
Supplement: f1 [file 1576292.f1.zip › 1576292.f1/Table 5 Comprehensive score of population system.docx]

Table 5 Comprehensive score of population system

|  | 2003 | 2004 | 2005 | 2006 | 2007 | 2008 | 2009 | 2010 | 2011 | 2012 | 2013 | 2014 | 2015 | 2016 |
| --- | --- | --- | --- | --- | --- | --- | --- | --- | --- | --- | --- | --- | --- | --- |
| **Beijing** | 0.497 | 0.606 | 0.616 | 0.498 | 0.557 | 0.593 | 0.611 | 0.629 | 0.598 | 0.657 | 0.674 | 0.674 | 0.667 | 0.662 |
| **Tianjin** | 0.229 | 0.237 | 0.215 | 0.247 | 0.262 | 0.271 | 0.287 | 0.303 | 0.353 | 0.372 | 0.343 | 0.316 | 0.316 | 0.418 |
| **Shijiazhuang** | 0.163 | 0.165 | 0.167 | 0.170 | 0.173 | 0.175 | 0.178 | 0.181 | 0.183 | 0.187 | 0.188 | 0.197 | 0.198 | 0.200 |
| **Taiyuan** | 0.055 | 0.059 | 0.052 | 0.056 | 0.056 | 0.058 | 0.064 | 0.068 | 0.069 | 0.083 | 0.081 | 0.094 | 0.104 | 0.103 |
| **Hohhot** | 0.013 | 0.013 | 0.013 | 0.013 | 0.015 | 0.017 | 0.019 | 0.024 | 0.032 | 0.032 | 0.042 | 0.037 | 0.039 | 0.039 |
| **Shenyang** | 0.155 | 0.154 | 0.141 | 0.142 | 0.145 | 0.144 | 0.150 | 0.160 | 0.181 | 0.173 | 0.209 | 0.212 | 0.213 | 0.206 |
| **Dalian** | 0.128 | 0.140 | 0.134 | 0.142 | 0.147 | 0.150 | 0.158 | 0.175 | 0.189 | 0.197 | 0.216 | 0.233 | 0.143 | 0.139 |
| **Changchun** | 0.128 | 0.152 | 0.172 | 0.135 | 0.136 | 0.139 | 0.141 | 0.146 | 0.152 | 0.156 | 0.185 | 0.182 | 0.215 | 0.203 |
| **Haerbin** | 0.224 | 0.225 | 0.207 | 0.207 | 0.210 | 0.211 | 0.212 | 0.211 | 0.227 | 0.243 | 0.243 | 0.223 | 0.219 | 0.218 |
| **Shanghai** | 0.500 | 0.425 | 0.494 | 0.452 | 0.474 | 0.497 | 0.513 | 0.528 | 0.585 | 0.617 | 0.647 | 0.680 | 0.686 | 0.684 |
| **Nanjing** | 0.118 | 0.119 | 0.127 | 0.135 | 0.144 | 0.162 | 0.176 | 0.187 | 0.202 | 0.216 | 0.278 | 0.307 | 0.332 | 0.386 |
| **Suzhou** | 0.112 | 0.120 | 0.134 | 0.153 | 0.184 | 0.191 | 0.208 | 0.234 | 0.250 | 0.261 | 0.377 | 0.401 | 0.416 | 0.433 |
| **Hangzhou** | 0.125 | 0.133 | 0.142 | 0.163 | 0.187 | 0.205 | 0.225 | 0.252 | 0.281 | 0.288 | 0.300 | 0.326 | 0.340 | 0.307 |
| **Ningbo** | 0.095 | 0.101 | 0.103 | 0.123 | 0.132 | 0.150 | 0.221 | 0.174 | 0.192 | 0.214 | 0.216 | 0.226 | 0.226 | 0.232 |
| **Hefei** | 0.066 | 0.063 | 0.078 | 0.068 | 0.085 | 0.087 | 0.095 | 0.095 | 0.156 | 0.165 | 0.193 | 0.193 | 0.216 | 0.219 |
| **Fuzhou** | 0.105 | 0.108 | 0.112 | 0.118 | 0.120 | 0.124 | 0.125 | 0.133 | 0.148 | 0.162 | 0.166 | 0.178 | 0.192 | 0.206 |
| **Xiamen** | 0.014 | 0.023 | 0.037 | 0.041 | 0.052 | 0.062 | 0.073 | 0.089 | 0.117 | 0.130 | 0.134 | 0.140 | 0.168 | 0.195 |
| **Nanchang** | 0.067 | 0.070 | 0.075 | 0.081 | 0.085 | 0.084 | 0.081 | 0.090 | 0.105 | 0.109 | 0.120 | 0.125 | 0.128 | 0.132 |
| **Jinan** | 0.146 | 0.156 | 0.174 | 0.174 | 0.171 | 0.173 | 0.177 | 0.188 | 0.189 | 0.200 | 0.247 | 0.277 | 0.284 | 0.301 |
| **Qingdao** | 0.101 | 0.109 | 0.131 | 0.135 | 0.144 | 0.200 | 0.202 | 0.179 | 0.164 | 0.172 | 0.192 | 0.191 | 0.192 | 0.213 |
| **Zhengzhou** | 0.123 | 0.128 | 0.130 | 0.143 | 0.138 | 0.150 | 0.148 | 0.197 | 0.230 | 0.250 | 0.239 | 0.241 | 0.232 | 0.252 |
| **Wuhan** | 0.190 | 0.199 | 0.206 | 0.215 | 0.203 | 0.215 | 0.227 | 0.244 | 0.276 | 0.272 | 0.282 | 0.287 | 0.302 | 0.299 |
| **Changsha** | 0.106 | 0.105 | 0.109 | 0.113 | 0.116 | 0.122 | 0.129 | 0.136 | 0.145 | 0.151 | 0.156 | 0.160 | 0.169 | 0.178 |
| **Guangzhou** | 0.197 | 0.216 | 0.230 | 0.246 | 0.270 | 0.283 | 0.293 | 0.314 | 0.366 | 0.459 | 0.387 | 0.414 | 0.436 | 0.446 |
| **Shenzhen** | 0.123 | 0.153 | 0.209 | 0.253 | 0.268 | 0.279 | 0.300 | 0.336 | 0.371 | 0.390 | 0.469 | 0.470 | 0.475 | 0.485 |
| **Nanning** | 0.100 | 0.105 | 0.110 | 0.114 | 0.116 | 0.125 | 0.134 | 0.142 | 0.153 | 0.127 | 0.138 | 0.145 | 0.155 | 0.168 |
| **Haikou** | 0.004 | 0.003 | 0.003 | 0.044 | 0.003 | 0.006 | 0.011 | 0.016 | 0.027 | 0.032 | 0.043 | 0.049 | 0.052 | 0.050 |
| **Chongqing** | 0.577 | 0.575 | 0.629 | 0.639 | 0.660 | 0.678 | 0.683 | 0.684 | 0.752 | 0.884 | 0.850 | 0.830 | 0.809 | 0.923 |
| **Chengdu** | 0.208 | 0.216 | 0.234 | 0.237 | 0.260 | 0.279 | 0.304 | 0.314 | 0.301 | 0.348 | 0.501 | 0.381 | 0.520 | 0.570 |
| **Guiyang** | 0.047 | 0.051 | 0.047 | 0.048 | 0.052 | 0.053 | 0.055 | 0.059 | 0.066 | 0.067 | 0.079 | 0.082 | 0.083 | 0.082 |
| **Kunming** | 0.084 | 0.087 | 0.098 | 0.100 | 0.124 | 0.131 | 0.113 | 0.123 | 0.123 | 0.148 | 0.213 | 0.158 | 0.132 | 0.173 |
| **Xi'an** | 0.142 | 0.144 | 0.151 | 0.159 | 0.166 | 0.173 | 0.182 | 0.189 | 0.200 | 0.212 | 0.225 | 0.231 | 0.236 | 0.241 |
| **Lanzhou** | 0.036 | 0.038 | 0.039 | 0.039 | 0.041 | 0.041 | 0.047 | 0.049 | 0.053 | 0.051 | 0.070 | 0.072 | 0.071 | 0.075 |
| **Xining** | 0.012 | 0.013 | 0.013 | 0.013 | 0.013 | 0.015 | 0.009 | 0.018 | 0.016 | 0.011 | 0.017 | 0.013 | 0.013 | 0.017 |
| **Yinchuan** | 0.007 | 0.006 | 0.004 | 0.003 | 0.021 | 0.003 | 0.003 | 0.004 | 0.004 | 0.012 | 0.014 | 0.046 | 0.046 | 0.017 |
| **Urumqi** | 0.007 | 0.017 | 0.028 | 0.031 | 0.037 | 0.035 | 0.030 | 0.032 | 0.040 | 0.042 | 0.050 | 0.074 | 0.077 | 0.082 |
