# Supplementary material for: Evaluation of Coupling Coordination among the Urban Physical Environment, Economy, and Population: A Case Study of 36 Main Cities in China
Source: Hindawi journal article supplement (doi:10.1155/2019/1576292), 2019-01-01
Supplement: f1 [file 1576292.f1.zip › 1576292.f1/Table 6 The scores of CCD among UPE- economy- and population.docx]

Table 6 The scores of CCD among UPE, economy, and population

|  | 2003 | 2004 | 2005 | 2006 | 2007 | 2008 | 2009 | 2010 | 2011 | 2012 | 2013 | 2014 | 2015 | 2016 |
| --- | --- | --- | --- | --- | --- | --- | --- | --- | --- | --- | --- | --- | --- | --- |
| **Beijing** | 0.618 | 0.642 | 0.683 | 0.673 | 0.696 | 0.715 | 0.730 | 0.735 | 0.742 | 0.755 | 0.618 | 0.642 | 0.683 | 0.673 |
| **Tianjin** | 0.512 | 0.528 | 0.523 | 0.548 | 0.567 | 0.587 | 0.602 | 0.610 | 0.653 | 0.662 | 0.512 | 0.528 | 0.523 | 0.548 |
| **Shijiazhuang** | 0.445 | 0.457 | 0.457 | 0.460 | 0.467 | 0.464 | 0.474 | 0.484 | 0.494 | 0.501 | 0.445 | 0.457 | 0.457 | 0.460 |
| **Taiyuan** | 0.318 | 0.328 | 0.312 | 0.317 | 0.325 | 0.324 | 0.338 | 0.351 | 0.354 | 0.383 | 0.318 | 0.328 | 0.312 | 0.317 |
| **Hohhot** | 0.167 | 0.169 | 0.167 | 0.168 | 0.179 | 0.187 | 0.202 | 0.222 | 0.255 | 0.259 | 0.167 | 0.169 | 0.167 | 0.168 |
| **Shenyang** | 0.463 | 0.468 | 0.459 | 0.467 | 0.481 | 0.483 | 0.490 | 0.505 | 0.528 | 0.525 | 0.463 | 0.468 | 0.459 | 0.467 |
| **Dalian** | 0.438 | 0.456 | 0.448 | 0.463 | 0.478 | 0.489 | 0.501 | 0.537 | 0.544 | 0.557 | 0.438 | 0.456 | 0.448 | 0.463 |
| **Changchun** | 0.426 | 0.448 | 0.445 | 0.443 | 0.454 | 0.459 | 0.459 | 0.470 | 0.478 | 0.492 | 0.426 | 0.448 | 0.445 | 0.443 |
| **Haerbin** | 0.479 | 0.488 | 0.480 | 0.480 | 0.487 | 0.492 | 0.506 | 0.518 | 0.529 | 0.548 | 0.479 | 0.488 | 0.480 | 0.480 |
| **Shanghai** | 0.634 | 0.643 | 0.659 | 0.672 | 0.677 | 0.686 | 0.706 | 0.710 | 0.731 | 0.743 | 0.634 | 0.643 | 0.659 | 0.672 |
| **Nanjing** | 0.430 | 0.438 | 0.446 | 0.458 | 0.475 | 0.494 | 0.512 | 0.528 | 0.550 | 0.568 | 0.430 | 0.438 | 0.446 | 0.458 |
| **Suzhou** | 0.438 | 0.448 | 0.469 | 0.495 | 0.535 | 0.544 | 0.564 | 0.588 | 0.600 | 0.614 | 0.438 | 0.448 | 0.469 | 0.495 |
| **Hangzhou** | 0.436 | 0.448 | 0.456 | 0.486 | 0.510 | 0.527 | 0.547 | 0.578 | 0.596 | 0.618 | 0.436 | 0.448 | 0.456 | 0.486 |
| **Ningbo** | 0.398 | 0.409 | 0.406 | 0.440 | 0.459 | 0.477 | 0.533 | 0.510 | 0.531 | 0.556 | 0.398 | 0.409 | 0.406 | 0.440 |
| **Hefei** | 0.328 | 0.331 | 0.365 | 0.348 | 0.382 | 0.387 | 0.403 | 0.407 | 0.484 | 0.496 | 0.328 | 0.331 | 0.365 | 0.348 |
| **Fuzhou** | 0.395 | 0.399 | 0.381 | 0.399 | 0.419 | 0.420 | 0.430 | 0.448 | 0.471 | 0.491 | 0.395 | 0.399 | 0.381 | 0.399 |
| **Xiamen** | 0.165 | 0.211 | 0.259 | 0.276 | 0.310 | 0.330 | 0.356 | 0.397 | 0.442 | 0.456 | 0.165 | 0.211 | 0.259 | 0.276 |
| **Nanchang** | 0.334 | 0.347 | 0.355 | 0.363 | 0.372 | 0.372 | 0.368 | 0.387 | 0.415 | 0.423 | 0.334 | 0.347 | 0.355 | 0.363 |
| **Jinan** | 0.461 | 0.476 | 0.495 | 0.494 | 0.498 | 0.497 | 0.502 | 0.520 | 0.531 | 0.549 | 0.461 | 0.476 | 0.495 | 0.494 |
| **Qingdao** | 0.394 | 0.413 | 0.442 | 0.449 | 0.464 | 0.512 | 0.517 | 0.509 | 0.497 | 0.510 | 0.394 | 0.413 | 0.442 | 0.449 |
| **Zhengzhou** | 0.426 | 0.434 | 0.440 | 0.456 | 0.455 | 0.463 | 0.465 | 0.506 | 0.540 | 0.557 | 0.426 | 0.434 | 0.440 | 0.456 |
| **Wuhan** | 0.483 | 0.498 | 0.508 | 0.516 | 0.523 | 0.539 | 0.552 | 0.577 | 0.594 | 0.603 | 0.483 | 0.498 | 0.508 | 0.516 |
| **Changsha** | 0.398 | 0.400 | 0.410 | 0.415 | 0.428 | 0.441 | 0.456 | 0.473 | 0.488 | 0.500 | 0.398 | 0.400 | 0.410 | 0.415 |
| **Guangzhou** | 0.525 | 0.543 | 0.564 | 0.582 | 0.606 | 0.620 | 0.633 | 0.656 | 0.683 | 0.730 | 0.525 | 0.543 | 0.564 | 0.582 |
| **Shenzhen** | 0.452 | 0.490 | 0.543 | 0.587 | 0.603 | 0.616 | 0.632 | 0.663 | 0.685 | 0.703 | 0.452 | 0.490 | 0.543 | 0.587 |
| **Nanning** | 0.363 | 0.380 | 0.391 | 0.406 | 0.414 | 0.410 | 0.427 | 0.434 | 0.445 | 0.416 | 0.363 | 0.380 | 0.391 | 0.406 |
| **Haikou** | 0.086 | 0.069 | 0.080 | 0.278 | 0.076 | 0.106 | 0.144 | 0.179 | 0.225 | 0.240 | 0.086 | 0.069 | 0.080 | 0.278 |
| **Chongqing** | 0.528 | 0.539 | 0.543 | 0.564 | 0.619 | 0.651 | 0.665 | 0.694 | 0.737 | 0.754 | 0.528 | 0.539 | 0.543 | 0.564 |
| **Chengdu** | 0.488 | 0.499 | 0.516 | 0.525 | 0.548 | 0.555 | 0.592 | 0.621 | 0.625 | 0.660 | 0.488 | 0.499 | 0.516 | 0.525 |
| **Guiyang** | 0.286 | 0.300 | 0.288 | 0.292 | 0.302 | 0.300 | 0.309 | 0.319 | 0.346 | 0.348 | 0.286 | 0.300 | 0.288 | 0.292 |
| **Kunming** | 0.342 | 0.353 | 0.364 | 0.375 | 0.403 | 0.413 | 0.397 | 0.423 | 0.427 | 0.465 | 0.342 | 0.353 | 0.364 | 0.375 |
| **Xi'an** | 0.443 | 0.443 | 0.453 | 0.460 | 0.476 | 0.486 | 0.498 | 0.510 | 0.526 | 0.536 | 0.443 | 0.443 | 0.453 | 0.460 |
| **Lanzhou** | 0.262 | 0.270 | 0.271 | 0.272 | 0.279 | 0.280 | 0.295 | 0.303 | 0.315 | 0.310 | 0.262 | 0.270 | 0.271 | 0.272 |
| **Xining** | 0.152 | 0.158 | 0.157 | 0.156 | 0.161 | 0.171 | 0.129 | 0.190 | 0.175 | 0.148 | 0.152 | 0.158 | 0.157 | 0.156 |
| **Yinchuan** | 0.123 | 0.113 | 0.092 | 0.076 | 0.204 | 0.073 | 0.078 | 0.095 | 0.095 | 0.157 | 0.123 | 0.113 | 0.092 | 0.076 |
| **Urumqi** | 0.116 | 0.183 | 0.234 | 0.247 | 0.267 | 0.262 | 0.241 | 0.251 | 0.282 | 0.293 | 0.116 | 0.183 | 0.234 | 0.247 |
